# Supplementary material
Source: PubMed Central journal article supplement (PMC3980410)
Supplement: mmc1.pdf [file mmc1.pdf]

The American Journal of Human Genetics, Volume 94

Supplemental Data

**Phevor Combines Multiple Biomedical Ontologies  
for Accurate Identification of Disease-Causing Alleles  
in Single Individuals and Small Nuclear Families**

Marc V. Singleton, Stephen L. Guthery, Karl V. Voelkerding, Karin Chen, Brett Kennedy,  
Rebecca L. Margraf, Jacob Durtschi, Karen Eilbeck, Martin G. Reese, Lynn B. Jorde,  
Chad D. Huff, and Mark Yandell

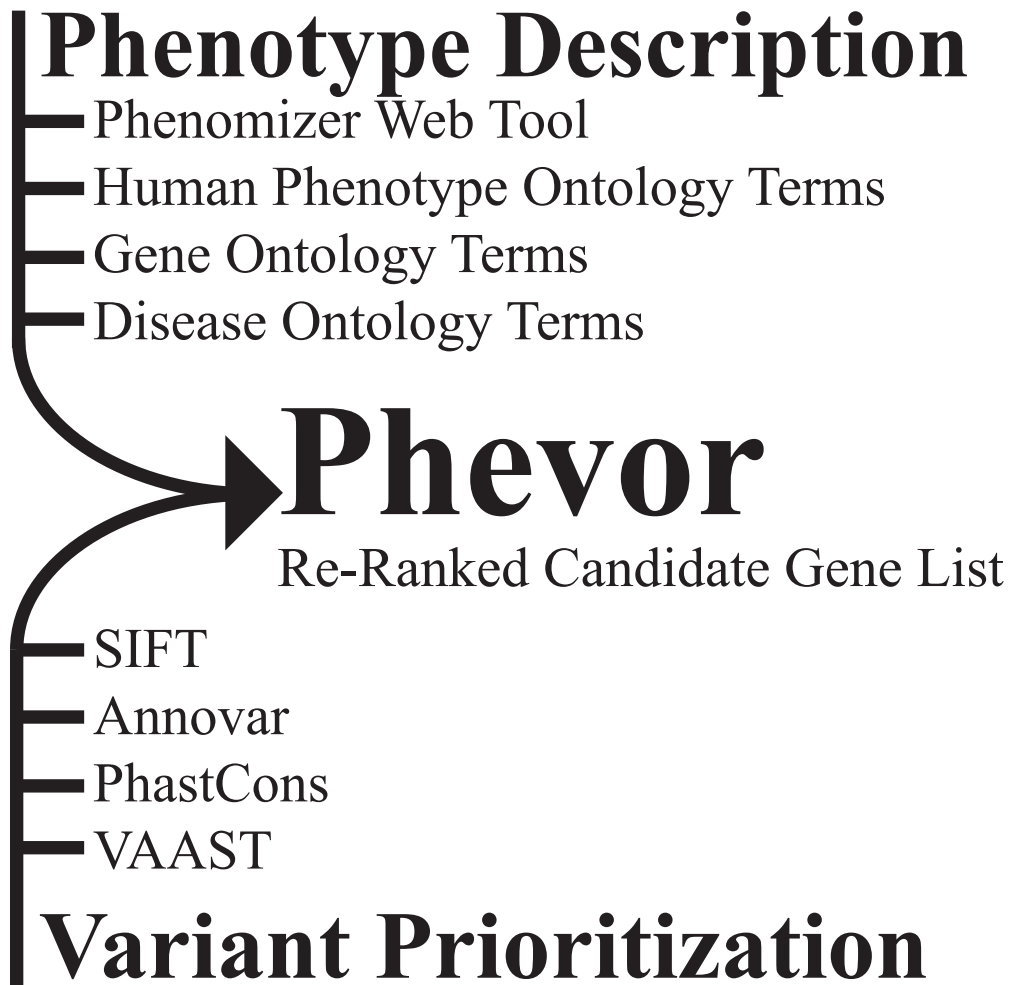

**Figure S1. Inputs to Phevor.** Phevor re-ranks the outputs of variant prioritization tools in light of phenotype and gene function information. The inputs to Phevor are individual variant scores from tools like SIFT and PhastCons, candidate gene lists as returned by Annovar, or prioritized gene lists such as VAAST output files. These are used together with a list of terms or their IDs describing the patient phenotype, gene functions, etc. drawn from the Human Phenotype Ontology (HPO), the Disease Ontology (DO), the Mammalian Phenotype Ontology (MPO), or the Gene Ontology (GO). Mixtures of terms from more than one ontology are permitted, as are OMIM disease terms. Users may also employ the online tool Phenomizer to describe a patient phenotype and to assemble a list of candidate-genes.

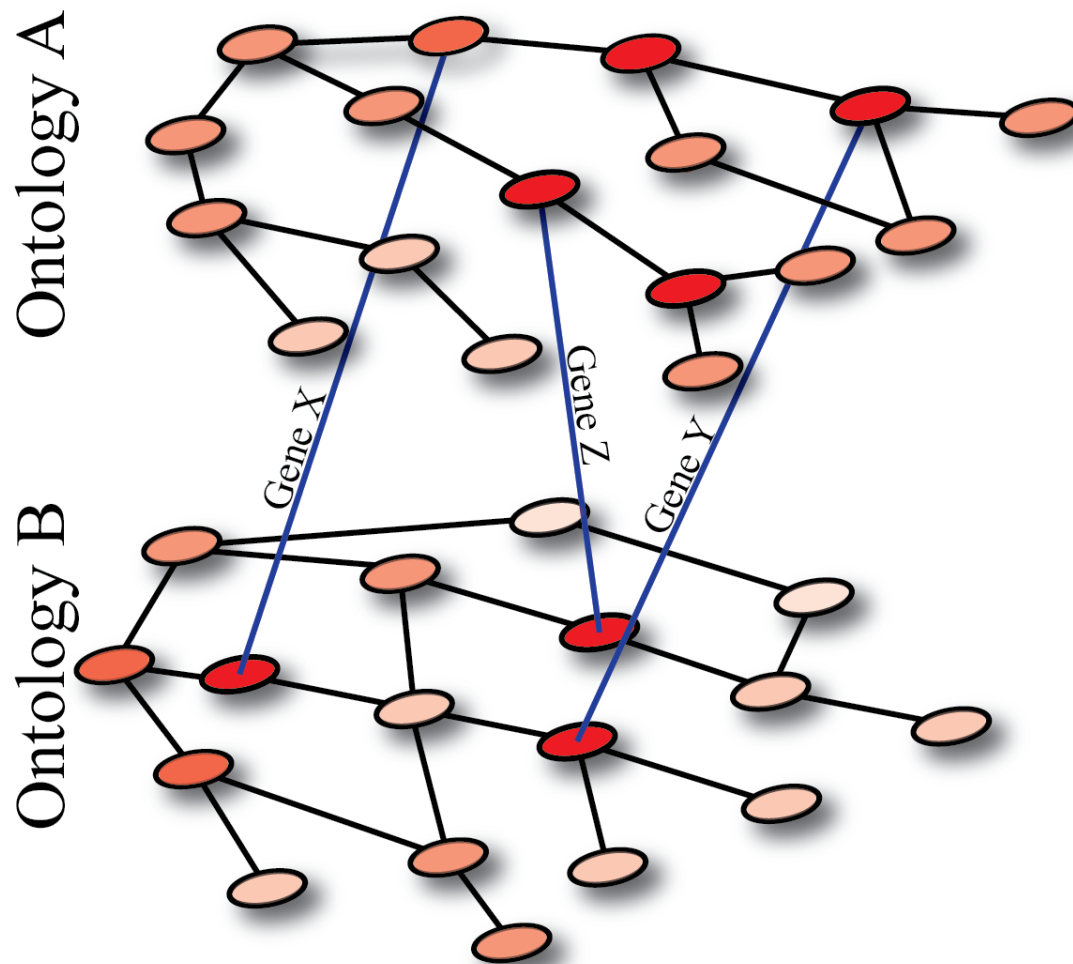

**Figure S2. Combining Ontologies.** Phevor relates different ontologies via their common gene annotations. Shown above are two generic ontologies A and B. Circles denote terms, or ‘nodes’, with edges denoting relationships between terms. For purposes of illustration, assume that each edge is directed, with the root of both ontologies lying at the top left-most node of the graph. The blue lines connecting the two ontologies represent three different genes X, Y and Z that are annotated to both ontologies. Phevor uses genes that have been annotated to two or more ontologies to relate terms in ontology A to those in B and vice versa. This cross-ontology linking procedure allows Phevor to combine knowledge from different ontological domains, e.g. phenotype information from HPO and gene function, process and location information from GO.

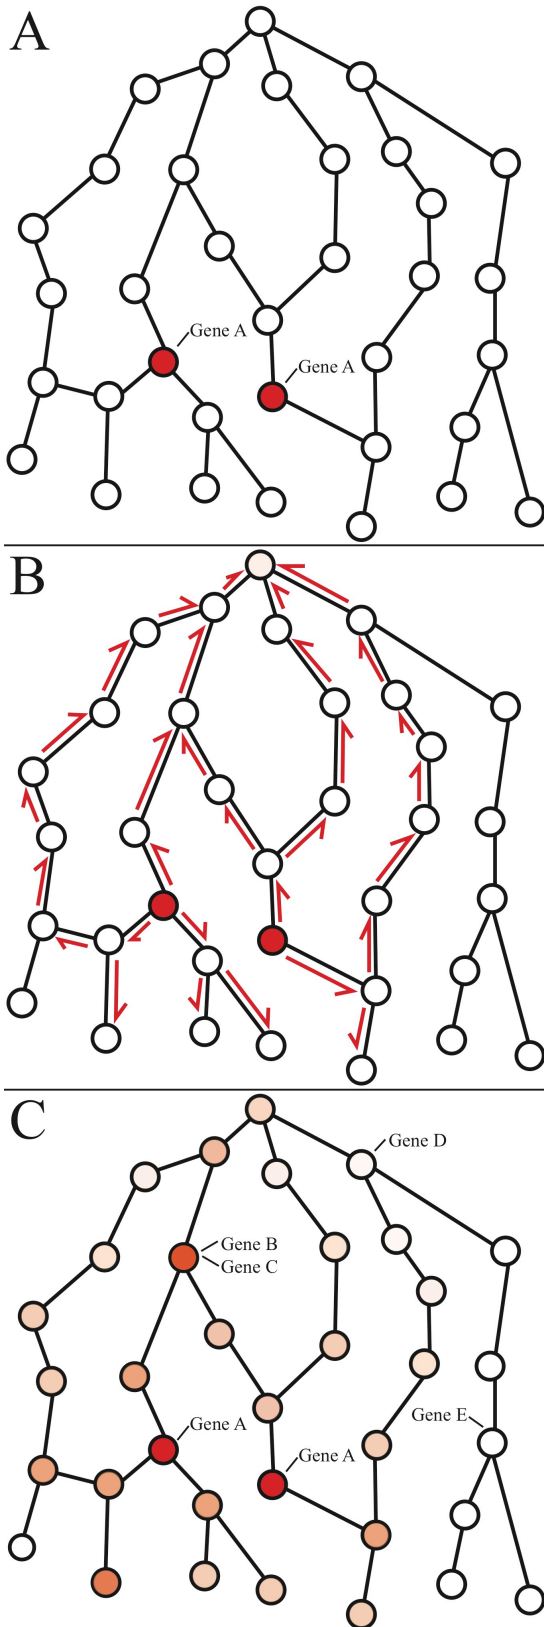

### Figure S3. Ontological propagation.

Starting from a user-provided set of terms (nodes), supplemented by the cross-ontology linking procedure illustrated in Figure S2, Phevor next propagates this information across each ontology. **Panel A** shows a hypothetical ontology, with two user-provided terms (nodes) shown in red. In this example, gene A has previously been annotated to both of these terms. This information is propagated across the ontology as illustrated in **Panel B**. First, these two 'seed nodes' are assigned a value of 1, and each time an edge is crossed to a neighboring node, the current value of the previous node is divided by 2. **Panel C** illustrates the end result of the propagation process, with node colors corresponding to the magnitudes of their propagation scores, with red representing nodes with the greatest scores, white nodes with scores near zero. Note that nodes located at intersecting threads of propagation, far from the original seeds can attain high values, even exceeding those of the starting seed nodes. The phenomenon is illustrated by the darker red nodes in **Panel C**, in which propagation has identified two additional gene-candidates, B and C not associated with the original seed nodes, but annotated to nodes with high propagation scores.

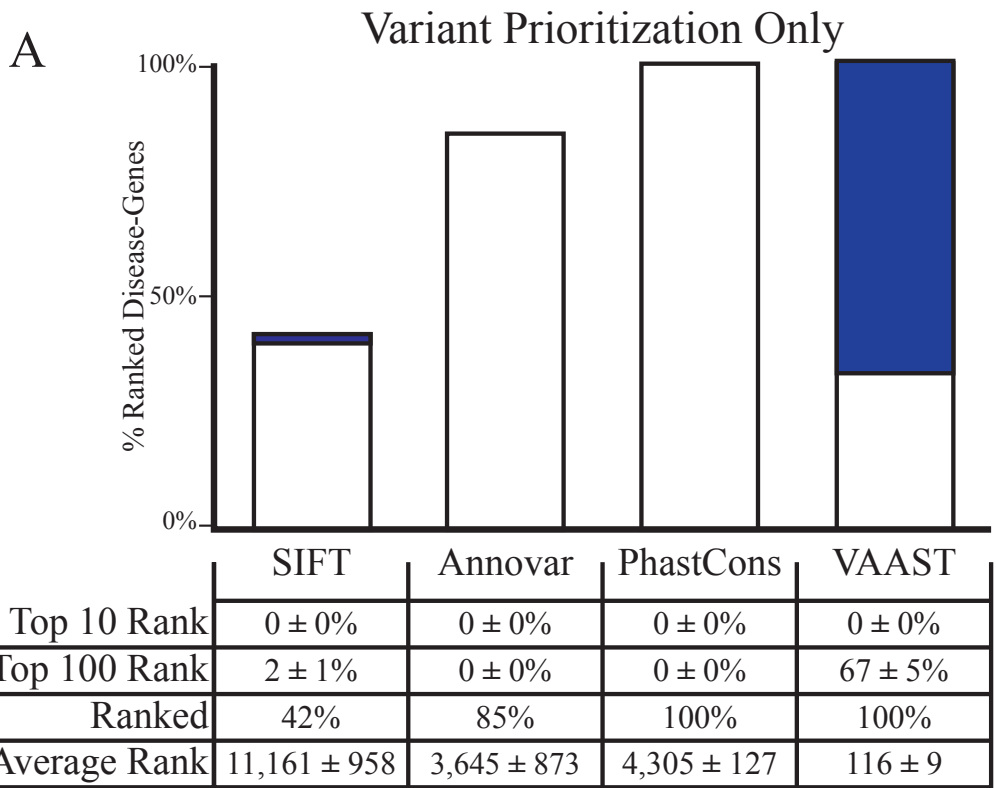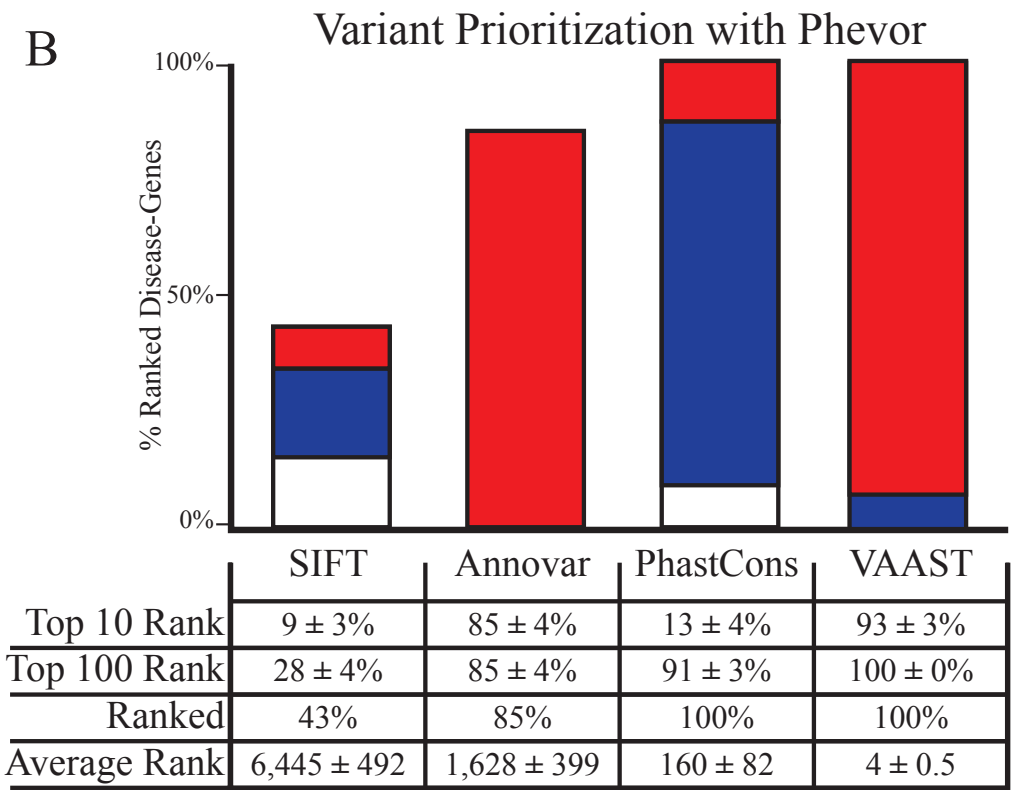

**Figure S4. Variant Prioritization for Known Disease Genes (dominant).**

Performance comparisons of four different variant prioritization tools before (top panel), and after (bottom panel) post-processing them with Phevor. A single copy of a known disease-causing allele was randomly selected from HGMD and spiked into a single target exome at the reported genomic location; hence these results model simple, dominant diseases. This process was repeated 100 times for 100 different, randomly selected known disease genes in order to determine margins of error. Bar charts show the percentage of time the disease gene was ranked among the top ten candidates genome-wide (red), or among the top 100 candidates (blue), with white denoting a rank greater than 100 in the candidate list. For the Phevor analyses shown in the bottom panel, each tool's output files were fed to Phevor along with phenotype report containing the HPO terms annotated to each disease gene. The table below the bar charts summarizes this information in more detail. Some bars do not reach 100% due to false negatives, *i.e.* the tool is unable to prioritize the disease-causing allele. Damaging alleles predicted to be benign were placed at the midpoint of the list 22,107 annotated human genes.

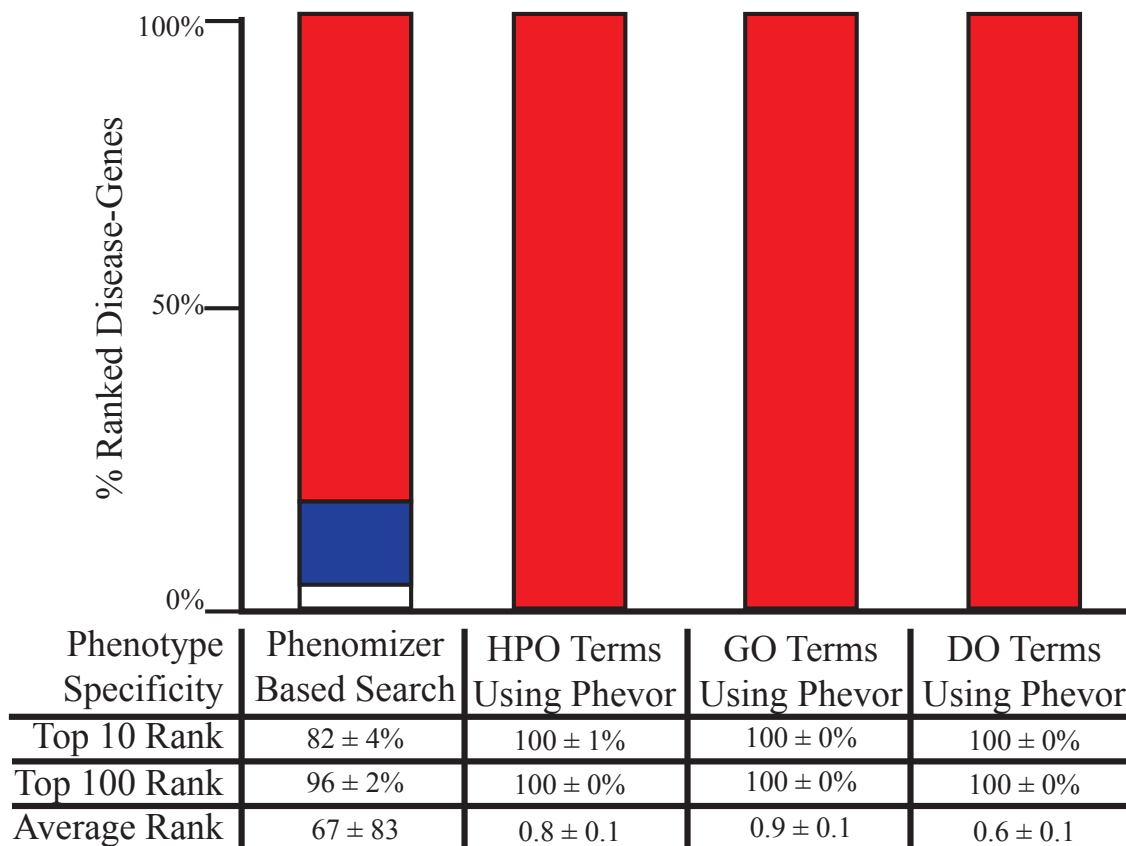

**Figure S5. Phevor Accuracy using different sources to describe patient phenotype and gene function.** Comparison of methods to generate the initial list of ontology terms to be fed into Phevor. Two copies of a known disease-causing allele were randomly selected from HGMD and spiked into a single target exome at the reported genomic location; hence these results model simple, recessive diseases. This process was repeated 100 times for 100 different, randomly selected known disease genes to determine margins of error. Bar charts show the percentage of time the disease gene was ranked among the top ten candidates genome-wide (red), or among the top 100 candidates (blue), with white denoting a rank greater than 100 in the candidate list. For reasons of economy, only VAAST results are shown. Each Phevor analyses were fed the VAAST results along with a term list consisting of ontology terms annotated to each disease gene as indicated. For the Phenomizer comparison, The HPO terms associated with that gene were used to query Phenomizer and the resulting report containing a list of candidate disease-genes was fed directly to Phevor. The table below the bar charts summarizes this information in more detail.

**Table S1. Phenotype terms used to create Figure 1 and Figure S4**

| Disease-Gene | Exomisr Rank | Annovar Rank | Annovar+Phevor Rank | OMIM Entry  | Disease Name                                                                                   |
|--------------|--------------|--------------|---------------------|-------------|------------------------------------------------------------------------------------------------|
| AARS2        | 842          | 88           | 0                   | OMIM:614096 | COMBINED OXIDATIVE PHOSPHORYLATION DEFICIENCY 8                                                |
| ACVR1        | 11000        | 88           | 1                   | OMIM:135100 | FIBRODYSPLASIA OSSIFICANS PROGRESSIVA                                                          |
| ALDH7A1      | 11000        | 11000        | 11000               | OMIM:266100 | EPILEPSY, PYRIDOXINE-DEPENDENT                                                                 |
| ARHGAP31     | 81           | 88           | 0                   | OMIM:100300 | ADAMS-OLIVER SYNDROME                                                                          |
| ATPIA2       | 2681         | 88           | 1                   | OMIM:602481 | MIGRAINE, FAMILIAL, HEMIPLEGIC, 2                                                              |
| ATP6V1B1     | 785          | 11000        | 11000               | OMIM:267300 | RENAL TUBULAR ACIDOSIS, DISTAL, WITH PROGRESSIVE NERVE DEAFNESS                                |
| BUB1B        | 2207         | 88           | 0                   | OMIM:257500 | MOSAIC VARIEGATED ANEUPLOIDY SYNDROME 1                                                        |
| C1S          | 2091         | 11000        | 11000               | OMIM:613783 | MACULAR DEGENERATION, AGE-RELATED, 11                                                          |
| C5           | 132          | 88           | 1                   | OMIM:609536 | COMPLEMENT COMPONENT C5 DEFICIENCY                                                             |
| CDKN1C       | 4            | 88           | 1                   | OMIM:130650 | COMPLEMENT COMPONENT 5 DEFICIENCY                                                              |
| CHD7         | 1            | 88           | 1                   | OMIM:214800 | BECKWITH-WIEDEMANN SYNDROME                                                                    |
| CNGB1        | 2            | 88           | 0                   | OMIM:613767 | CHARGE SYNDROME                                                                                |
| COL10A1      | 2            | 88           | 1                   | OMIM:156500 | RETINITIS PIGMENTOSA 45                                                                        |
| CSF3         | 2625         | 11000        | 11000               | OMIM:611953 | METAPHYSEAL CHONDRODYSPLASIA, SCHMID TYPE                                                      |
| DLX3         | 2963         | 88           | 0                   | OMIM:104510 | MACULAR DEGENERATION, AGE-RELATED, 11                                                          |
| DNAC19       | 99           | 88           | 0                   | OMIM:610198 | AMELIOGENESIS IMPERFECTA, TYPE IV                                                              |
| DRD2         | 11000        | 11000        | 11000               | OMIM:159900 | 3-O-METHYLGUTACONIC ACIDURIA, TYPE V                                                           |
| EGR2         | 2            | 88           | 0                   | OMIM:145900 | MYOCLONIC DYSTONIA                                                                             |
| ENOS         | 11000        | 11000        | 11000               | OMIM:612932 | HYPERTROPHIC NEUROPATHY OF DEJERINE-SOTTAS                                                     |
| ETHE1        | 135          | 88           | 1                   | OMIM:602473 | GLYCOGEN STORAGE DISEASE XIII                                                                  |
| FOXC1        | 1            | 88           | 1                   | OMIM:601631 | ENCEPHALOPATHY, ETHYLMALONIC                                                                   |
| FOXP3        | 1            | 88           | 1                   | OMIM:304790 | IRIDODYSPLASIA, TYPE I                                                                         |
| GCHI         | 25           | 11000        | 11000               | OMIM:128230 | IMMUNODYSREGULATION, POLYENDOCRINOPATHY, AND ENTEROPATHY, X-LINKED                             |
| GCM2         | 1            | 88           | 0                   | OMIM:146200 | DYSTONIA, DOPA-RESPONSIVE                                                                      |
| GDF3         | 3120         | 88           | 0                   | OMIM:613704 | HYPOPARATHYROIDISM, FAMILIAL, ISOLATED                                                         |
| GJA8         | 88           | 88           | 0                   | OMIM:116200 | MICROPHthalmia, ISOLATED 7                                                                     |
| GLEX5        | 11000        | 11000        | 11000               | OMIM:205950 | CATARACT, ZONULAR PULVERULENT 1                                                                |
| GNAS         | 2793         | 88           | 0                   | OMIM:174800 | ANEMIA, CONGENITAL SIDEROBLASTIC, B6-NONRESPONSIVE                                             |
| GRXCR1       | 16           | 11000        | 11000               | OMIM:613285 | MCCUNE-ALBRIGHT SYNDROME                                                                       |
| GT2H5        | 825          | 88           | 0                   | OMIM:601675 | DEAFNESS, AUTOSOMAL RECESSIVE 25                                                               |
| HBA1         | 791          | 11000        | 11000               | OMIM:140700 | TRICHOHYDROTRYPHY, PHOTSENSITIVE                                                               |
| HEX1         | 17           | 88           | 0                   | OMIM:182230 | HEINZ BODY ANEMIAS                                                                             |
| HEX1         | 17           | 88           | 0                   | OMIM:182230 | SEPTOOPTIC DYSPLASIA                                                                           |
| HSBP3        | 11000        | 11000        | 11000               | OMIM:613176 | NEURONOPATHY, DISTAL, HEREDITARY MOTOR, TYPE IIC                                               |
| IFT122       | 1706         | 88           | 1                   | OMIM:218330 | CRANIOECTODERMAL DYSPLASIA                                                                     |
| IFT140       | 27           | 88           | 1                   | OMIM:266920 | MAINZER-SALDINO SYNDROME                                                                       |
| IFT80        | 1            | 11000        | 11000               | OMIM:611263 | ASPHYXIATING THORACIC DYSTROPHY 2                                                              |
| IL1RAPL1     | 174          | 88           | 0                   | OMIM:300143 | MENTAL RETARDATION, X-LINKED 21                                                                |
| IMPDH1       | 3615         | 88           | 0                   | OMIM:180105 | RETINITIS PIGMENTOSA 10                                                                        |
| INP5E        | 1            | 88           | 1                   | OMIM:213400 | JOUBERT SYNDROME 1                                                                             |
| KLK4         | 10           | 11000        | 11000               | OMIM:204700 | AMELIOGENESIS IMPERFECTA, PIGMENTED HYPMATURATION TYPE                                         |
| KRT11        | 2840         | 88           | 1                   | OMIM:116860 | CEREBRAL CAVERNOUS MALFORMATIONS                                                               |
| KRT14        | 2            | 11000        | 11000               | OMIM:131760 | EPIDERMOLYSIS BULLOSA SIMPLEX, DOWLING-MEARA TYPE                                              |
| LOXHD1       | 96           | 11000        | 11000               | OMIM:613079 | DEAFNESS, AUTOSOMAL RECESSIVE 77                                                               |
| MCT1         | 11000        | 88           | 0                   | OMIM:604004 | MEGALENCEPHALIC LEUKOENCEPHALOPATHY WITH SUBCORTICAL CYSTS 1                                   |
| MOC5         | 1184         | 11000        | 11000               | OMIM:606056 | CONGENITAL DISORDER OF GLYCOSYLATION, TYPE IIB                                                 |
| MTMR2        | 102          | 88           | 1                   | OMIM:601382 | CHARCOT-MARIE-TOOTH DISEASE, TYPE 4B1                                                          |
| MYH7         | 11000        | 88           | 1                   | OMIM:160500 | MYOPATHY, DISTAL, 1                                                                            |
| NDUF4F4      | 11000        | 88           | 1                   | OMIM:252010 | MITOCHONDRIAL COMPLEX I DEFICIENCY                                                             |
| NEUROD1      | 72           | 11000        | 11000               | OMIM:606394 | MATURITY-ONSET DIABETES OF THE YOUNG, TYPE 6                                                   |
| NOP10        | 25           | 11000        | 11000               | OMIM:224230 | DYSKERATOSIS CONGENITA, AUTOSOMAL RECESSIVE, 1                                                 |
| NOTCH2       | 4            | 88           | 1                   | OMIM:610205 | ALACILIA SYNDROME 2                                                                            |
| NPHP4        | 2935         | 88           | 0                   | OMIM:609666 | NEPHRONOPHTHISIS 4                                                                             |
| NPHS2        | 11000        | 88           | 0                   | OMIM:600995 | NEPHROTIC SYNDROME, TYPE 2                                                                     |
| NRAS         | 2643         | 88           | 0                   | OMIM:188470 | THYROID CARCINOMA, FOLLICULAR                                                                  |
| OPN1MW       | 20           | 11000        | 11000               | OMIM:303700 | BLUE CONE MONOCHROMACY                                                                         |
| OTX2         | 1093         | 88           | 0                   | OMIM:613986 | PITUITARY HORMONE DEFICIENCY, COMBINED, 6                                                      |
| PEN1B        | 2234         | 88           | 1                   | OMIM:614920 | PEROXISOME BIOGENESIS DISORDER 14B                                                             |
| PTX1         | 7            | 11000        | 11000               | OMIM:119800 | CLUBFOOT, CONGENITAL, WITH OR WITHOUT DEFICIENCY OF LONG BONES AND/OR MIRROR-IMAGE POLYDACTYLY |
| PLP1         | 7            | 88           | 1                   | OMIM:312920 | SPASTIC PARAPLEGIA 2, X-LINKED                                                                 |
| PRO1         | 11000        | 88           | 0                   | OMIM:262600 | PITUITARY HORMONE DEFICIENCY, COMBINED, 2                                                      |
| PROS1        | 14           | 88           | 0                   | OMIM:614514 | THROMBOPHILIA DUE TO PROTEIN S DEFICIENCY, AUTOSOMAL RECESSIVE                                 |
| PRPH2        | 2            | 88           | 1                   | OMIM:608161 | MACULAR DYSTROPHY, VITELLIFORM, ADULT-ONSET                                                    |
| RAB3GAP1     | 215          | 88           | 1                   | OMIM:600118 | WARBURG MICRO SYNDROME 1                                                                       |
| RBM25        | 886          | 11000        | 11000               | OMIM:612079 | ALOPECIA, NEUROLOGIC DEFECTS, AND ENDOCRINOPATHY SYNDROME                                      |
| RFXS         | 28           | 88           | 0                   | OMIM:209920 | BARE LYMPHOCYTE SYNDROME, TYPE II                                                              |
| ROB2         | 1            | 88           | 0                   | OMIM:268310 | ROBINOW SYNDROME, AUTOSOMAL RECESSIVE                                                          |
| RPGRP1       | 132          | 88           | 0                   | OMIM:608194 | CONE-ROD DYSTROPHY 13                                                                          |
| RPS10        | 11000        | 88           | 0                   | OMIM:613508 | DIAMOND-BLACKFAN ANEMIA 9                                                                      |
| RSPH4A       | 2026         | 11000        | 11000               | OMIM:612649 | CILIARY DYSKINESIA, PRIMARY, 11                                                                |
| SCN2A        | 27           | 88           | 1                   | OMIM:607745 | SEIZURES, BENIGN FAMILIAL INFANTILE, 3                                                         |
| SCN3B        | 2172         | 11000        | 11000               | OMIM:613120 | BRUGADA SYNDROME 7                                                                             |
| SERPINA6     | 4892         | 11000        | 11000               | OMIM:611489 | CORTICOSTEROID-BINDING GLOBULIN DEFICIENCY                                                     |
| SH3BP2       | 2023         | 88           | 0                   | OMIM:118400 | CHERUBISM                                                                                      |
| SHANK3       | 2454         | 88           | 0                   | OMIM:606232 | CHROMOSOME 22Q13.3 DELETION SYNDROME                                                           |
| SLC22A5      | 11000        | 88           | 0                   | OMIM:212140 | CARNITINE DEFICIENCY, SYSTEMIC, PRIMARY                                                        |
| SLC35C1      | 2512         | 88           | 1                   | OMIM:266265 | CONGENITAL DISORDER OF GLYCOSYLATION, TYPE IIC                                                 |
| SLC7A7       | 35           | 88           | 0                   | OMIM:222700 | LYSINURIC PROTEIN INTOLERANCE                                                                  |
| SLCO1B1      | 11000        | 11000        | 11000               | OMIM:237450 | HYPERBILIRUBINEMIA, ROTOR TYPE                                                                 |
| SMAD4        | 4            | 88           | 0                   | OMIM:174900 | JUVENILE POLYPOSIS SYNDROME                                                                    |
| SMARCA4      | 3555         | 88           | 0                   | OMIM:614609 | MENTAL RETARDATION, AUTOSOMAL DOMINANT 16                                                      |
| SMOC2        | 94           | 88           | 1                   | OMIM:125400 | DENTIN DYSPLASIA, TYPE I                                                                       |
| SOD1         | 1728         | 88           | 0                   | OMIM:105400 | AMYOTROPHIC LATERAL SCLEROSIS 1                                                                |
| SOS1         | 2306         | 88           | 0                   | OMIM:135300 | FIBROMATOSIS, GINGIVAL, 1                                                                      |
| SPTLC1       | 185          | 88           | 1                   | OMIM:162400 | NEUROPATHY, HEREDITARY SENSORY AND AUTONOMIC, TYPE IA                                          |
| SOSTM1       | 136          | 88           | 1                   | OMIM:602080 | PAGET DISEASE OF BONE                                                                          |
| SRD5A3       | 100          | 88           | 0                   | OMIM:612713 | KAHRIZI SYNDROME                                                                               |
| TCN2         | 82           | 88           | 0                   | OMIM:275350 | TRANSCOBALAMIN II DEFICIENCY                                                                   |
| TGFB1        | 2344         | 88           | 0                   | OMIM:609192 | LEOYS-DITZ SYNDROME, TYPE IA                                                                   |
| TGM5         | 818          | 11000        | 11000               | OMIM:609796 | PEELING SKIN SYNDROME, ACRAL TYPE                                                              |
| TJP2         | 5233         | 11000        | 11000               | OMIM:607748 | HYPERCHOLANEMIA, FAMILIAL                                                                      |
| TMEM216      | 25           | 88           | 0                   | OMIM:608091 | JOUBERT SYNDROME 2                                                                             |
| TP63         | 7            | 88           | 0                   | OMIM:106260 | ANKYLOLEPHARON-ECTODERMAL DEFECTS-CLEFT LIP/PALATE                                             |
| TTN          | 88           | 88           | 0                   | OMIM:600334 | TIBIAL MUSCULAR DYSTROPHY, TARDIVE                                                             |
| UBR1         | 1697         | 88           | 0                   | OMIM:243800 | OHANSON-BLIZZARD SYNDROME                                                                      |
| WDR11        | 11000        | 88           | 0                   | OMIM:614858 | HYPOGONADOTROPIC HYPOGONADISM 14 WITH OR WITHOUT ANOSMIA                                       |
| WIPF1        | 114          | 88           | 0                   | OMIM:614493 | WISKOTT-ALDRICH SYNDROME 2                                                                     |
| WN17A        | 10           | 88           | 0                   | OMIM:276820 | ULNA AND FIBULA, ABSENCE OF, WITH SEVERE LIMB DEFICIENCY                                       |
| XPC          | 8            | 88           | 1                   | OMIM:278720 | XERODERMA PIGMENTOSUM, COMPLEMENTATION GROUP C                                                 |
| ZFYVE26      | 1068         | 88           | 1                   | OMIM:270700 | SPASTIC PARAPLEGIA 15, AUTOSOMAL RECESSIVE                                                     |
| ZMPSTE24     | 77           | 88           | 1                   | OMIM:275210 | RESTRICTIVE DERMOPATHY, LETHAL                                                                 |
